# Supplementary material for: Distribution, Site-Specific Water Quality Criteria, and Ecological Risk Assessment of Heavy Metals in Surface Water in Fen River, China
Source: MDPI journal article supplement (doi:10.3390/toxics11080704), 2023-08-15
Supplement: s1 [file s1]

**Table S1 Acute toxicity of freshwater aquatic organisms of copper in Fen River**

| Species                           | Total copper<br>LC <sub>50</sub> µg/L | Dissolved<br>Copper/µg/L | Hardness<br>CaCO <sub>3</sub> /mgL | Tem <sup>1</sup> °C | pH   | DOC<br>mg/L | Ca<br>mg/L | Mg<br>mg/L | Na<br>mg/L | K<br>mg/L | SO <sub>4</sub> <sup>2-</sup><br>mg/L | Cl <sup>-</sup><br>mg/L | Alkalinity<br>mg/L | Referen<br>ce |
|-----------------------------------|---------------------------------------|--------------------------|------------------------------------|---------------------|------|-------------|------------|------------|------------|-----------|---------------------------------------|-------------------------|--------------------|---------------|
| <i>Lumbriculus<br/>variegatus</i> | 130                                   | —                        | 290                                | 25                  | 6.57 | 0.5         | 47.8602    | 41.47      | 89.821     | 7.178     | 278.4                                 | 6.508                   | 235                | [1]           |
|                                   | 270                                   | —                        | 290                                | 25                  | 7.29 | 0.5         | 47.8602    | 41.47      | 89.821     | 7.178     | 278.4                                 | 6.508                   | 235                |               |
|                                   | 500                                   | —                        | 290                                | 25                  | 5.25 | 0.5         | 47.8602    | 41.47      | 89.821     | 7.178     | 278.4                                 | 6.508                   | 235                |               |
| <i>Ceriodaphnia<br/>dubia</i>     | 19                                    | —                        | 52                                 | 24.5                | 7.5  | 1.1         | 15.2833    | 3.3713     | 1.5        | 0.57      | 3.8                                   | 1.4                     | 55                 | [2]           |
|                                   | 17                                    | —                        | 52                                 | 24.5                | 7.5  | 1.1         | 15.2833    | 3.3713     | 1.5        | 0.57      | 3.8                                   | 1.4                     | 55                 |               |
|                                   | —                                     | 25                       | 45                                 | 25                  | 7.72 | 1.5         | 11.0991    | 4.2075     | 9.5        | 1.6       | 46                                    | 34                      | 39.7               | [3]           |
|                                   | —                                     | 17                       | 45                                 | 25                  | 7.72 | 1.5         | 11.0991    | 4.2075     | 9.5        | 1.6       | 46                                    | 34                      | 39.7               |               |
|                                   | —                                     | 30                       | 45                                 | 25                  | 7.72 | 1.5         | 11.0991    | 4.2075     | 9.5        | 1.6       | 46                                    | 34                      | 39.7               |               |
|                                   | —                                     | 24                       | 45                                 | 25                  | 7.72 | 1.5         | 11.0991    | 4.2075     | 9.5        | 1.6       | 46                                    | 34                      | 39.7               |               |
|                                   | —                                     | 28                       | 45                                 | 25                  | 7.72 | 1.5         | 11.0991    | 4.2075     | 9.5        | 1.6       | 46                                    | 34                      | 39.7               |               |
|                                   | —                                     | 32                       | 45                                 | 25                  | 7.72 | 1.5         | 11.0991    | 4.2075     | 9.5        | 1.6       | 46                                    | 34                      | 39.7               |               |
|                                   | —                                     | 23                       | 45                                 | 25                  | 7.72 | 1.5         | 11.0991    | 4.2075     | 9.5        | 1.6       | 46                                    | 34                      | 39.7               |               |
|                                   | —                                     | 20                       | 45                                 | 25                  | 7.72 | 1.5         | 11.0991    | 4.2075     | 9.5        | 1.6       | 46                                    | 34                      | 39.7               |               |

|      |        |      |      |      |      |         |         |         |        |        |        |        |       |     |
|------|--------|------|------|------|------|---------|---------|---------|--------|--------|--------|--------|-------|-----|
|      | —      | 19   | 45   | 25   | 7.72 | 1.5     | 11.0991 | 4.2075  | 9.5    | 1.6    | 46     | 34     | 39.7  |     |
|      | —      | 26   | 94.1 | 25   | 8.15 | 2       | 23.2094 | 8.7984  | 5.2449 | 1.6    | 20.054 | 6.171  | 69.6  |     |
|      | —      | 21   | 94.1 | 25   | 8.15 | 2       | 23.2094 | 8.7984  | 5.2449 | 1.6    | 20.054 | 6.171  | 69.6  |     |
|      | —      | 27   | 94.1 | 25   | 8.15 | 2       | 23.2094 | 8.7984  | 5.2449 | 1.6    | 20.054 | 6.171  | 69.6  |     |
|      | —      | 37   | 94.1 | 25   | 8.15 | 2       | 23.2094 | 8.7984  | 5.2449 | 1.6    | 20.054 | 6.171  | 69.6  |     |
|      | —      | 34   | 94.1 | 25   | 8.15 | 2       | 23.2094 | 8.7984  | 5.2449 | 1.6    | 20.054 | 6.171  | 69.6  |     |
|      | —      | 67   | 179  | 25   | 8.31 | 2.3     | 50.1069 | 13.1232 | 14.32  | 2.4    | 22.673 | 10.979 | 140.1 |     |
|      | —      | 38   | 179  | 25   | 8.31 | 2.3     | 50.1069 | 13.1232 | 14.32  | 2.4    | 22.673 | 10.979 | 140.1 |     |
|      | —      | 78   | 179  | 25   | 8.31 | 2.3     | 50.1069 | 13.1232 | 14.32  | 2.4    | 22.673 | 10.979 | 140.1 |     |
|      | —      | 81   | 179  | 25   | 8.31 | 2.3     | 50.1069 | 13.1232 | 14.32  | 2.4    | 22.673 | 10.979 | 140.1 |     |
|      | —      | 28   | 97.6 | 25   | 8    | 2       | 24.0727 | 9.1256  | 5.44   | 1.6    | 20.8   | 6.4    | 74.2  | [3] |
|      | —      | 84   | 182  | 25   | 8    | 2.3     | 50.9467 | 13.3432 | 14.56  | 2.4    | 23.053 | 11.163 | 144.3 |     |
| 13.4 | —      | 57.1 | 25   | 8.18 | 0.5  | 9.42352 | 8.1653  | 17.685  | 1.413  | 54.815 | 1.2814 | 81     | [4]   |     |
| 6.98 | —      | 80   | 20   | 7.6  | 0.5  | 13.2028 | 11.44   | 24.778  | 1.980  | 76.799 | 1.7953 | 53     | [5]   |     |
| 25   | 24     | 105  | 25   | 8.4  | 0.5  | 26      | 8.5     | 8.7     | 1      | 18     | 9.1    | 100    | [6]   |     |
| 111  | 106.56 | 102  | 25   | 8.3  | 2.5  | 25      | 8.3     | 8.5     | 0.9    | 16     | 9.4    | 91     |       |     |

|                |      |        |     |    |      |     |         |         |        |        |        |        |     |     |
|----------------|------|--------|-----|----|------|-----|---------|---------|--------|--------|--------|--------|-----|-----|
|                | 157  | 150.72 | 106 | 25 | 8.3  | 5   | 26      | 8.5     | 9.2    | 1      | 20     | 11     | 94  |     |
|                | 147  | 141.12 | 103 | 25 | 8.3  | 5   | 26      | 8.5     | 9.2    | 1      | 20     | 11     | 93  |     |
|                | 267  | 256.32 | 106 | 25 | 8.3  | 10  | 26      | 8.6     | 9.4    | 1.1    | 29     | 16     | 96  |     |
|                | 9.1  | —      | 39  | 20 | 7.8  | 1.1 | 10.9867 | 2.7776  | 5.8136 | 0.7    | 7.9394 | 7.7684 | 51  |     |
|                | 11.7 | —      | 39  | 20 | 7.8  | 1.1 | 10.9867 | 2.7776  | 5.8136 | 0.7    | 7.9394 | 7.7684 | 51  |     |
|                | 6.6  | —      | 39  | 20 | 7.79 | 1.1 | 10.7129 | 2.7203  | 5.7423 | 0.7    | 7.6578 | 7.6406 | 50  |     |
|                | 9.9  | —      | 39  | 20 | 7.79 | 1.1 | 10.7129 | 2.7203  | 5.7423 | 0.7    | 7.6578 | 7.6406 | 50  |     |
|                | 11.7 | —      | 39  | 20 | 6.9  | 1.1 | 10.9867 | 2.7776  | 5.8136 | 0.7    | 7.9394 | 7.7684 | 30  | [7] |
|                | 6.7  | —      | 39  | 20 | 6.9  | 1.1 | 10.9867 | 2.7776  | 5.8136 | 0.7    | 7.9394 | 7.7684 | 30  |     |
| <i>Daphnia</i> | 9.1  | —      | 26  | 20 | 7.6  | 1.1 | 7.4273  | 2.0327  | 4.8867 | 0.7    | 4.2786 | 6.107  | 24  |     |
| <i>magna</i>   | 5.2  | —      | 27  | 20 | 7.7  | 1.1 | 7.7011  | 2.09    | 4.958  | 0.7    | 4.5602 | 6.2348 | 24  |     |
|                | 41.2 | —      | 170 | 20 | 7.8  | 0.5 | 27.9433 | 24.2353 | 52.507 | 4.196  | 162.74 | 3.8045 | 115 |     |
|                | 10.5 | —      | 170 | 20 | 7.8  | 0.5 | 27.9433 | 24.2353 | 52.507 | 4.196  | 162.74 | 3.8045 | 115 |     |
|                | 20.6 | —      | 170 | 20 | 7.8  | 0.5 | 27.9433 | 24.2353 | 52.507 | 4.196  | 162.74 | 3.8045 | 115 | [8] |
|                | 17.3 | —      | 170 | 20 | 7.8  | 0.5 | 27.9433 | 24.2353 | 52.507 | 4.1961 | 162.74 | 3.8045 | 115 |     |
|                | 70.7 | —      | 170 | 20 | 7.8  | 0.5 | 27.9433 | 24.2353 | 52.507 | 4.1961 | 162.74 | 3.8045 | 115 |     |

|      |   |       |      |      |     |         |         |        |        |        |        |        |      |
|------|---|-------|------|------|-----|---------|---------|--------|--------|--------|--------|--------|------|
| 31.3 | — | 170   | 20   | 7.8  | 0.5 | 27.9433 | 24.2353 | 52.507 | 4.1961 | 162.74 | 3.8045 | 115    | [9]  |
| 7.1  | — | 109.9 | 21   | 6.93 | 2.4 | 40      | 2.43    | 85.1   | 1.23   | 10     | 106    | 12.5   |      |
| 16.4 | — | 109.9 | 21   | 6.93 | 3.4 | 40      | 2.43    | 85.1   | 1.23   | 10     | 106    | 12.5   |      |
| 39.9 | — | 109.9 | 21   | 7.43 | 3.4 | 40      | 2.43    | 85.1   | 1.23   | 10     | 106    | 13.875 |      |
| 18.7 | — | 109.9 | 21   | 7.43 | 2.4 | 40      | 2.43    | 85.1   | 1.23   | 10     | 106    | 13.875 |      |
| 18.9 | — | 109.9 | 21   | 7.82 | 2.4 | 40      | 2.43    | 85.1   | 1.23   | 10     | 106    | 14.5   |      |
| 39.7 | — | 109.9 | 21   | 7.82 | 3.4 | 40      | 2.43    | 85.1   | 1.23   | 10     | 106    | 14.5   |      |
| 46   | — | 109.9 | 21   | 6.93 | 4.4 | 40      | 2.43    | 85.1   | 1.23   | 10     | 106    | 12.5   |      |
| 71.9 | — | 109.9 | 21   | 6.93 | 6.1 | 40      | 2.43    | 85.1   | 1.23   | 10     | 106    | 12.5   |      |
| 57.2 | — | 109.9 | 21   | 7.43 | 4.4 | 40      | 2.43    | 85.1   | 1.23   | 10     | 106    | 13.875 |      |
| 67.8 | — | 109.9 | 21   | 7.82 | 4.4 | 40      | 2.43    | 85.1   | 1.23   | 10     | 106    | 14.5   | [10] |
| 26   | — | 52    | 18.2 | 7.8  | 1.1 | 14      | 3.5     | 12     | 2.9    | 23     | 11     | 45     |      |
| 30   | — | 105   | 20.3 | 7.9  | 1.1 | 29      | 6.8     | 29     | 5.3    | 57     | 21     | 79     |      |
| 38   | — | 106   | 19.7 | 8.1  | 1.1 | 29      | 6.8     | 29     | 5.3    | 57     | 21     | 82     |      |
| 69   | — | 207   | 19.9 | 8.3  | 1.1 | 58      | 13      | 62     | 8.2    | 127    | 40     | 166    |      |
| 4.8  | — | 7.1   | 24   | 8.55 | 0.5 | 1.15182 | 1.02739 | 3.5102 | 2.8052 | 6.8159 | 2.5434 | 56     |      |

|                       |         |           |          |    |      |       |         |        |        |        |        |        |        |      |
|-----------------------|---------|-----------|----------|----|------|-------|---------|--------|--------|--------|--------|--------|--------|------|
|                       | 7.4     | —         | 20.6     | 24 | 6.97 | 0.5   | 3.39973 | 2.9458 | 2.5478 | 2.1356 | 19.776 | 1.9363 | 60     |      |
|                       | 6.5     | —         | 23       | 24 | 8.52 | 0.5   | 3.79581 | 3.289  | 2.8446 | 2.3845 | 22.08  | 2.1619 | 64     |      |
|                       | 197.53  | —         | 198.6471 | 21 | 7.57 | 11.12 | 77.13   | 1.47   | 50.47  | 0.46   | 55     | 33     | 142    |      |
|                       | 134.55  | —         | 903.6216 | 21 | 7.98 | 4.99  | 66.35   | 179.2  | 35.31  | 0.51   | 76     | 43.8   | 193    |      |
|                       | 244.45  | —         | 167.8175 | 21 | 8    | 20.12 | 64.47   | 1.66   | 126.7  | 0.47   | 52     | 57.6   | 219    |      |
|                       | 155.69  | —         | 997.6020 | 21 | 8.07 | 10.84 | 78.59   | 194.6  | 64.93  | 0.53   | 90     | 72.4   | 258    |      |
|                       | 350     | —         | 120.3696 | 21 | 7.98 | 11.95 | 46.54   | 1.01   | 70.01  | 0.59   | 63     | 50.8   | 69     | [11] |
|                       | 210.49  | —         | 417.1427 | 21 | 7.72 | 7.31  | 104.9   | 37.69  | 128.4  | 7.31   | 67     | 66.2   | 87     |      |
|                       | 194.78  | —         | 136.5252 | 21 | 7.56 | 10.06 | 53.01   | 1.01   | 58.54  | 0.6    | 55     | 44     | 79     |      |
|                       | 187.77  | —         | 457.7211 | 21 | 7.86 | 6.44  | 111.8   | 43.36  | 140.9  | 15.46  | 66     | 54     | 98     |      |
|                       | 71.46   | —         | 12.047   | 21 | 8.4  | 1.9   | 4       | 0.5    | 0.75   | 0.35   | 0.1    | 2      | 48     |      |
|                       | 365.7   | 351.072   | 156.3014 | 21 | 8.1  | 0.05  | 44.9    | 10.73  | 69.5   | 10     | 42.92  | 88.8   | 138.58 |      |
|                       | 425.48  | 408.4608  | 156.3014 | 21 | 8.3  | 1     | 44.9    | 10.73  | 69.5   | 10     | 42.92  | 88.8   | 138.58 |      |
| <i>Hypophthalmi</i>   | 270.04  | 259.2384  | 156.3014 | 21 | 8.3  | 0.5   | 44.9    | 10.73  | 69.5   | 10     | 42.92  | 88.8   | 138.58 | [12] |
| <i>chtys molitrix</i> | 639.77  | 614.1792  | 156.3014 | 21 | 8.3  | 2     | 44.9    | 10.73  | 69.5   | 10     | 42.92  | 88.8   | 138.58 |      |
|                       | 1138.78 | 1093.2288 | 156.3014 | 21 | 8.3  | 4     | 44.9    | 10.73  | 69.5   | 10     | 42.92  | 88.8   | 138.58 |      |

|                                      |         |           |          |      |      |      |         |         |         |        |        |         |        |      |
|--------------------------------------|---------|-----------|----------|------|------|------|---------|---------|---------|--------|--------|---------|--------|------|
| <i>Ctenopharyng<br/>odon idellus</i> | 2364.09 | 2269.5264 | 156.3014 | 22   | 7.9  | 4    | 44.9    | 10.73   | 70.65   | 10     | 42.92  | 88.8    | 138.58 | [12] |
| <i>Ctenopharyng<br/>odon idellus</i> | 917.89  | 881.1744  | 156.3014 | 22.1 | 8    | 2    | 44.9    | 10.73   | 61.45   | 10     | 42.92  | 88.8    | 138.58 | [12] |
|                                      | 846.06  | 812.2176  | 156.3014 | 22.3 | 7.9  | 0.5  | 44.9    | 10.73   | 56.85   | 10     | 42.92  | 88.8    | 138.58 |      |
|                                      | 772.68  | 741.7728  | 156.3014 | 21   | 7.9  | 1    | 44.9    | 10.73   | 54.55   | 10     | 42.92  | 88.8    | 138.58 |      |
|                                      | 831.19  | 797.9424  | 156.3014 | 21   | 7.9  | 0.05 | 44.9    | 10.73   | 52.25   | 10     | 42.92  | 88.8    | 138.58 |      |
| <i>Ctenophryodo<br/>n idellus</i>    | 846.67  | 812.8032  | —        | 20   | 8    | 1    | 44.9    | 10.73   | 69.5    | 10     | 42.92  | 88.8    | 138.58 | [13] |
|                                      | 773.24  | 742.3104  | —        | 20   | 8    | 2    | 44.9    | 10.73   | 69.5    | 10     | 42.92  | 88.8    | 138.58 |      |
|                                      | 918.56  | 881.8176  | —        | 20   | 8    | 3    | 44.9    | 10.73   | 69.5    | 10     | 42.92  | 88.8    | 138.58 |      |
|                                      | 2365.8  | 2271.168  | —        | 20   | 8    | 4    | 44.9    | 10.73   | 69.5    | 10     | 42.92  | 88.8    | 138.58 |      |
| <i>Macrobrachiu<br/>m nipponense</i> | 417     | —         | 253      | 18.6 | 7.78 | 0.05 | 80.1818 | 12.1694 | 17.7074 | 3.0158 | 48.069 | 73.6497 | 44     | [14] |
| <i>Cyprinus<br/>carpio</i>           | 912     | —         | 248      | 18.5 | 7.84 | 0.05 | 80.1818 | 12.1694 | 17.7074 | 3.0158 | 48.069 | 73.6497 | 44     | [14] |
| <i>Pseudorasbor<br/>a parva</i>      | 347     | —         | 238      | 18.4 | 7.73 | 0.05 | 80.1818 | 12.1694 | 17.7074 | 3.0158 | 48.069 | 73.6497 | 44     | [14] |

|                       |                 |   |     |      |      |      |         |         |         |        |        |         |    |      |
|-----------------------|-----------------|---|-----|------|------|------|---------|---------|---------|--------|--------|---------|----|------|
| <i>Carassius</i>      |                 |   |     |      |      |      |         |         |         |        |        |         |    |      |
| <i>auratus</i>        | 1405            | — | 248 | 18.5 | 7.85 | 0.05 | 80.1818 | 12.1694 | 17.7074 | 3.0158 | 48.069 | 73.6497 | 44 | [14] |
| <i>Misgurnus</i>      |                 |   |     |      |      |      |         |         |         |        |        |         |    |      |
| <i>anguillicaudat</i> | 24              | — | 256 | 19.1 | 7.81 | 0.05 | 80.1818 | 12.1694 | 17.7074 | 3.0158 | 48.069 | 73.6497 | 44 | [14] |
| <i>us</i>             |                 |   |     |      |      |      |         |         |         |        |        |         |    |      |
| <i>Chironomus</i>     |                 |   |     |      |      |      |         |         |         |        |        |         |    |      |
| <i>plumosus</i>       | 10 <sup>6</sup> | — | 251 | 18.5 | 7.74 | 0.05 | 80.1818 | 12.1694 | 17.7074 | 3.0158 | 48.069 | 73.6497 | 44 | [14] |

Note: <sup>1</sup> Temp. is temperature.

**Table S2 Acute toxicity of freshwater aquatic organisms of lead in Fen River**

| Species                          | ATV <sup>1</sup> (ug/L) | Hardness (CaCO <sub>3</sub> mg/L) | Reference |
|----------------------------------|-------------------------|-----------------------------------|-----------|
| <i>Daphnia magna</i> *           | 3610                    | 240                               | [15]      |
|                                  | 894                     | 150                               | [16]      |
|                                  | 450                     | 45                                | [17]      |
|                                  | 1910                    | 152                               | [18]      |
| <i>Tubifex tubifex</i>           | 165220                  | 237                               | [19]      |
|                                  | 334140                  | 237                               |           |
|                                  | 454760                  | 237                               |           |
|                                  | 514190                  | 237                               |           |
|                                  | 450000                  | 224                               | [20]      |
| <i>Ceriodaphnia dubia</i> *      | 2700                    | 290                               | [1]       |
|                                  | 248                     | 100                               | [21]      |
|                                  | 208.8                   | 82.4                              | [22]      |
|                                  | 256.9                   | 80                                | [23]      |
|                                  | 1760.4                  | 172                               |           |
| <i>Cyprinus carpio</i> *         | 1190                    | 120                               | [24]      |
|                                  | 1350                    | 58                                |           |
|                                  | 1780                    | 90                                |           |
|                                  | 1890                    | 170                               |           |
|                                  | 3530                    | 120                               |           |
|                                  | 1400                    | 280                               |           |
|                                  | 13350                   | 360                               | [25]      |
| <i>Chironomus tentans</i> *      | 34670                   | 25                                | [26]      |
|                                  | 220000                  | 224                               | [20]      |
| <i>Lumbriculus variegatus</i> *  | 8000                    | 290                               | [27]      |
|                                  | 1800                    | 30                                |           |
| <i>Ctenopharyngodon idllus</i> * | 576410                  | 160                               | [28]      |
|                                  | 3730                    | 10                                | [29]      |
| <i>Carassius auratus</i> *       | 273900                  | 160                               | [30]      |
|                                  | 11590                   | 10                                | [29]      |
|                                  | 169470                  | 120                               | [31]      |
| <i>Rhodeus ocellatus</i>         | 13187                   | 250                               | [32]      |
| <i>Daphnia carinata</i>          | 444                     | 82.4                              | [22]      |
| <i>Tanytarsus dissimilis</i>     | 258                     | 46.8                              | [33]      |
| <i>Chlorella saccharophila</i>   | 63800                   | -                                 | [34]      |
| <i>Rhodeus ocellatus</i> *       | 6784                    | 50                                | [35]      |
|                                  | 25557                   | 150                               |           |
|                                  | 44325                   | 250                               |           |
| <i>Margaria melanooides</i> *    | 3052                    | 50                                | [35]      |
|                                  | 22457                   | 150                               |           |



|                                     |       |     |      |
|-------------------------------------|-------|-----|------|
|                                     | 39644 | 250 |      |
| <i>Pseudorasbora parva</i> *        | 9155  | 50  | [35] |
|                                     | 38950 | 150 |      |
|                                     | 60216 | 250 |      |
| <i>Misgurnus anguillicaudatus</i> * | 12772 | 50  | [35] |
|                                     | 42873 | 150 |      |
|                                     | 63838 | 250 |      |

Note: <sup>1</sup> ATV is acute toxicity value; All species used of water quality reference normalization were marked with an \*.

**Table S3 Acute toxicity of freshwater aquatic organisms of zinc in Fen River**

| Species                              | ATV <sup>1</sup> (µg/L) | Hardness (CaCO <sub>3</sub> mg/L) | Reference |
|--------------------------------------|-------------------------|-----------------------------------|-----------|
| <i>Cyprinus carpio</i>               | 7800                    | 55                                | [36]      |
|                                      | 3120                    | 19                                | [37]      |
| <i>Daphnia</i> sp.*                  | 500                     | 6.5                               | [38]      |
|                                      | 5200                    | 400                               |           |
|                                      | 100                     | 45                                | [17]      |
| <i>Chironomus</i> sp.*               | 890                     | 50                                | [39]      |
|                                      | 1160                    | 100                               |           |
|                                      | 1630                    | 250                               |           |
|                                      | 2590                    | 400                               |           |
| <i>Daphnia magna</i> *               | 90                      | 50                                | [39]      |
|                                      | 140                     | 100                               |           |
|                                      | 230                     | 250                               |           |
|                                      | 690                     | 400                               |           |
| <i>Limnodrilus hoffmeisteri</i> *    | 1950                    | 50                                | [39]      |
|                                      | 2290                    | 100                               |           |
|                                      | 3330                    | 250                               |           |
|                                      | 6310                    | 400                               |           |
| <i>Cipangopaludian cathayensis</i> * | 2340                    | 50                                | [39]      |
|                                      | 3070                    | 100                               |           |
|                                      | 4760                    | 250                               |           |
|                                      | 7690                    | 400                               |           |
| <i>Pseudorasbora parva</i> *         | 2570                    | 150                               | [40]      |
|                                      | 18000                   | 250                               | [39]      |
|                                      | 20600                   | 400                               |           |
| <i>Gyraulius</i> sp.                 | 3292                    | 62                                | [41]      |
|                                      | 1400                    | 14                                |           |
|                                      | 1451                    | 18                                |           |
| <i>Gammarus</i> sp.                  | 8100                    | 50                                | [36]      |
| <i>Ceriodaphnia dubia</i>            | 180                     | 52                                | [42]      |
| <i>Lemna minor</i>                   | 3014                    | 100                               | [43]      |

|                                   |       |     |      |
|-----------------------------------|-------|-----|------|
| <i>Chlorella vulgaris</i>         | 153   | 100 | [44] |
| <i>Ceriodaphnia dubia</i>         | 354   | 280 | [45] |
| <i>Misgurnus anguillicaudatus</i> | 16910 | 150 | [40] |
| <i>Ctenopharyngodon idellus</i>   | 31370 | 120 | [46] |
| <i>Rhodeus ocellatus</i>          | 8004  | 150 | [40] |
| <i>Margarya melanoidees</i>       | 7945  | 150 | [40] |
| <i>Palaemon modestus</i>          | 267   | 150 | [40] |

Note: <sup>1</sup> ATV is acute toxicity value; All species used of water quality reference normalization were marked with an \*.

**Table S4 Acute toxicity of freshwater aquatic organisms of cadmium in Fen River**

| Species                           | ATV <sup>1</sup> (ug/L) | Hardness (CaCO <sub>3</sub> mg/L) | Reference |
|-----------------------------------|-------------------------|-----------------------------------|-----------|
| <i>Carassius auratus</i> *        | 2193                    | 50                                | [47]      |
|                                   | 11123                   | 150                               |           |
|                                   | 13938                   | 250                               |           |
| <i>Limnodrilus hoffmeisteri</i> * | 188                     | 50                                |           |
|                                   | 227                     | 153                               |           |
|                                   | 431                     | 265                               |           |
| <i>Pelteobagrus fulvidraco</i> *  | 3909                    | 50                                |           |
|                                   | 13609                   | 150                               |           |
|                                   | 17397                   | 250                               |           |
| <i>Daphnia pulex</i> *            | 47                      | 57                                | [48]      |
|                                   | 319                     | 240                               | [49]      |
|                                   | 100                     | 120                               | [50]      |
| <i>Cyprinus carpio</i> *          | 17100                   | 100                               | [51]      |
|                                   | 240                     | 55                                | [36]      |
|                                   | 220770                  | 185                               | [52]      |
| <i>Tubifex tubifex</i> *          | 61470                   | 237                               | [19]      |
|                                   | 440                     | 45                                |           |
|                                   | 7950                    | 173                               |           |
|                                   | 8500                    | 305                               |           |
|                                   | 1658                    | 250                               |           |
| <i>Lumbriculus variegates</i> *   | 120                     | 30                                | [27]      |
|                                   | 780                     | 290                               | [1]       |
| <i>Ceriodaphnia dubia</i> *       | 31.47                   | 40                                | [53]      |
|                                   | 361.1                   | 172                               | [23]      |
| <i>Diaphanosoma brachyurum</i>    | 1060                    | 93                                | [54]      |
| <i>Moina macrocopa</i>            | 71.25                   | 82                                | [55]      |
| <i>Gammarus pseudolimnaeu</i>     | 49                      | 76.8                              | [56]      |
| <i>Lemna minor</i>                | 54                      | 39                                | [57]      |
| <i>Gammarus pulex</i>             | 50                      | 117.4                             | [58]      |

|                                     |       |     |      |
|-------------------------------------|-------|-----|------|
| <i>Daphnia magna</i>                | 3.6   | 170 | [8]  |
| <i>Palaemon modestus</i> *          | 6     | 50  | [59] |
|                                     | 12    | 150 |      |
|                                     | 18    | 250 |      |
| <i>Misgurnus anguillicaudatus</i> * | 3054  | 50  |      |
|                                     | 11647 | 150 |      |
|                                     | 18849 | 250 |      |
| <i>Pseudorasbora parva</i> *        | 3318  | 50  |      |
|                                     | 5512  | 150 |      |
|                                     | 8503  | 250 |      |
| <i>Margaria melanoidees</i> *       | 1868  | 50  |      |
|                                     | 3969  | 150 |      |
|                                     | 5659  | 250 |      |
| <i>Rhodeus ocellatus</i> *          | 2825  | 50  |      |
|                                     | 7833  | 150 |      |
|                                     | 10072 | 250 |      |

Note: <sup>1</sup> ATV is acute toxicity value; All species used of water quality reference normalization were marked with an \*.

**Table S5 Acute toxicity of freshwater aquatic organisms of chromium in Fen River**

| Species              | ATV <sup>1</sup> (ug/L) | Hardness (CaCO <sub>3</sub> mg/L) | Reference |
|----------------------|-------------------------|-----------------------------------|-----------|
| <i>Daphnia magna</i> | 24.2                    | 45                                | [60]      |
|                      | 66.7                    | 188                               | [61]      |
|                      | 73.6                    | 196                               |           |
|                      | 75.8                    | 213                               |           |
|                      | 85.7                    | 196                               |           |
|                      | 131                     | 185                               |           |
|                      | 137                     | 212                               |           |
|                      | 157                     | 92                                | [62]      |
|                      | 164                     | 185                               | [61]      |
|                      | 175                     | 100                               | [62]      |
|                      | 212                     | 213                               | [61]      |
|                      | 250                     | 93                                | [63]      |
|                      | 550                     | 180                               | [64]      |
|                      | 1300                    | -                                 | [65]      |
|                      | 778                     | -                                 | [66]      |
|                      | 19.9                    | 50                                | [61]      |
|                      | 21.3                    | 50                                |           |
|                      | 157                     | 212                               |           |
|                      | 15.3                    | 50                                |           |
|                      | 20.6                    | 50                                |           |
|                      | 22                      | 45                                | [67]      |

|                                        |        |     |      |
|----------------------------------------|--------|-----|------|
| <i>Daphnia pulex</i>                   | 36.3   | 45  | [68] |
|                                        | 48     | 45  | [67] |
|                                        | 220    | 50  | [69] |
|                                        | 260    | 171 | [70] |
| <i>Lymnaea Luteola</i>                 | 3880   | 195 | [71] |
| <i>Tubifex tubifex</i>                 | 872    | 237 | [19] |
|                                        | 1227   | 237 |      |
|                                        | 1846   | 237 |      |
|                                        | 2720   | 237 |      |
|                                        | 9800   | 123 | [72] |
|                                        | 190    | 245 | [73] |
| <i>Lumbriculus variegatus</i>          | 11000  | 130 | [74] |
|                                        | 13300  | 30  | [27] |
| <i>Ceriodaphnia</i> sp.                | 144    | 100 | [21] |
|                                        | 1500   | 102 | [75] |
|                                        | 45.2   | 45  | [60] |
|                                        | 45     | 45  | [67] |
| <i>Carassius auratus</i>               | 168500 | 120 | [76] |
|                                        | 94570  | 150 | [77] |
|                                        | 244100 | 300 | [78] |
|                                        | 37500  | 20  | [79] |
| <i>Cyprinus carpio</i>                 | 123000 | 220 | [80] |
| <i>Macrobrachium nipponensis</i>       | 2241   | -   | [81] |
|                                        | 38.48  | 120 | [76] |
| <i>Moina macrocopa</i>                 | 360    | -   | [82] |
| <i>Carassius auratus</i>               | 139000 | -   | [83] |
| <i>Hypophthalmichthys molitrix</i>     | 13160  | 120 | [76] |
| <i>Scenedesmus obliquus</i>            | 680    | -   | [84] |
| <i>Scenedesmus quadricauda</i>         | 20890  | -   | [85] |
| <i>Pseudokirchneriella subcapitata</i> | 129.7  | -   | [86] |
|                                        | 84.3   | -   |      |
| <i>Pelteobagrus fulvidraco</i>         | 15790  | 120 | [87] |
|                                        | 57980  | 120 |      |
| <i>Margarya melanooides</i>            | 3.602  | 150 | [35] |
| <i>Pseudorasbora parva</i>             | 30.341 | 150 |      |
| <i>Misgurnus anguillicaudatus</i>      | 35.491 | 150 |      |
| <i>Palaemon modestus</i>               | 0.357  | 150 |      |

Note: <sup>1</sup> ATV is acute toxicity value.

**Table S6 Acute toxicity of freshwater aquatic organisms of nickel in Fen River**

| Species                        | ATV <sup>1</sup> (ug/L) | Hardness (CaCO <sub>3</sub> mg/L) | Reference |
|--------------------------------|-------------------------|-----------------------------------|-----------|
| <i>Ceriodaphnia dubia</i> *    | 148                     | 113                               | [88]      |
|                                | 400                     | 253                               |           |
|                                | 81                      | 50                                |           |
|                                | 137.37                  | 172                               | [23]      |
|                                | 64.80                   | 80                                |           |
|                                | 674                     | 142                               | [89]      |
|                                | 30                      | 69.5                              | [90]      |
| <i>Desmodesmus subspicatus</i> | 360                     | -                                 | [91]      |
| <i>Lemna minor</i>             | 450                     | -                                 | [92]      |
|                                | 210                     | -                                 | [93]      |
|                                | 360                     | -                                 |           |
|                                | 330                     | -                                 |           |
|                                | 1290                    | -                                 | [94]      |
| <i>Scenedesmus quadricauda</i> | 1500                    | -                                 | [91]      |
|                                | 900                     | -                                 | [95]      |
| <i>Hyaella azteca</i> *        | 393.07                  | 240                               | [96]      |
|                                | 3045                    | 98                                | [88]      |
|                                | 2000                    | 119.5                             | [97]      |
| <i>Daphnia pulex</i>           | 1480                    | 142                               | [89]      |
|                                | 3890                    | 142                               |           |
|                                | 912.33                  | 127                               | [98]      |
| <i>Daphnia magna</i> *         | 1800                    | 51                                | [18]      |
|                                | 2360                    | 100                               |           |
|                                | 1920                    | 104                               |           |
|                                | 4970                    | 206                               |           |
|                                | 7300                    | 240                               | [99]      |
|                                | 7590                    | 240                               |           |
|                                | 915                     | 51.1                              | [100]     |
| <i>Danio rerio</i> *           | 9068                    | 141                               | [101]     |
|                                | 18919                   | 141                               |           |
|                                | 13120                   | 141                               |           |
|                                | 589.9                   | 7.8                               |           |
| <i>Tubifex tubifex</i>         | 25100                   | 237                               | [19]      |
|                                | 18000                   | 237                               |           |
|                                | 18970                   | 237                               |           |
|                                | 25460                   | 237                               |           |
| <i>Oncorhynchus mykiss</i> *   | 19200                   | 250                               | [83]      |
|                                | 8900                    | 33                                | [102]     |
|                                | 7790                    | 50                                | [103]     |

|                                   |        |       |       |
|-----------------------------------|--------|-------|-------|
|                                   | 15000  | 285   | [104] |
|                                   | 13700  | 35    | [105] |
|                                   | 16300  | 200   |       |
| <i>Carassius auratus</i>          | 63000  | 126   | [106] |
| <i>Chironomus</i> sp.             | 8.6    | 50    | [107] |
| <i>Lumbriculus variegatus</i>     | 32000  | 130   | [74]  |
|                                   | 48000  | 130   |       |
| <i>Cyprinus carpio</i> *          | 10400  | 55    | [36]  |
|                                   | 40800  | 126   | [106] |
|                                   | 43650  | 305   | [108] |
|                                   | 14790  | 305   |       |
|                                   | 48000  | 305   |       |
|                                   | 6900   | 305   |       |
|                                   | 35000  | 112   | [109] |
|                                   | 6160   | 128   | [110] |
|                                   | 10600  | 53    | [111] |
| <i>Gammarus fasciatus</i>         | 100000 | 130   | [74]  |
| <i>Chironomus dilutus</i>         | 119500 | 119.5 | [97]  |
| <i>Paramisgurnus dabryanus</i>    | 228560 | 150   | [112] |
| <i>Misgurnus anguillicaudatus</i> | 275420 | 150   | [112] |

Note: <sup>1</sup> ATV is acute toxicity value; All species used of water quality reference normalization were marked with an \*.

**Table S7 Acute toxicity of freshwater aquatic organisms of manganese in Fen River**

| Species                        | ATV <sup>1</sup> (ug/L) | Hardness (CaCO <sub>3</sub> mg/L) | Reference |
|--------------------------------|-------------------------|-----------------------------------|-----------|
| <i>Nais elinguis</i>           | 360                     | 18.72                             | [113]     |
| <i>Desmodesmus subspicatus</i> | 15300                   | -                                 | [114]     |
|                                | 12100                   | -                                 |           |
|                                | 22800                   | -                                 |           |
|                                | 8030                    | -                                 |           |
|                                | 5920                    | -                                 |           |
| <i>Closterium lunula</i>       | 12600                   | -                                 | [115]     |
| <i>Hyalella azteca</i> *       | 8567                    | 80                                | [116]     |
|                                | 3000                    | 26                                |           |
|                                | 13700                   | 164                               |           |
| <i>Daphnia magna</i> *         | 10280                   | 170                               |           |
|                                | 19400                   | 170                               |           |
|                                | 9800                    | 45.3                              |           |
| <i>Chlorella pyrenoidosa</i>   | 17000                   | -                                 | [115]     |
| <i>Ceriodaphnia dubia</i> *    | 14500                   | 92                                | [116]     |
|                                | 14500                   | 92                                |           |

|                                  |         |       |       |
|----------------------------------|---------|-------|-------|
|                                  | 6700    | 26    |       |
|                                  | 5700    | 26    |       |
|                                  | 15900   | 184   |       |
|                                  | 14500   | 184   |       |
| <i>Chironomus javanus</i>        | 5270    | 18.72 | [113] |
| <i>Chironomus tentans</i> *      | 5800    | 25    | [116] |
|                                  | 42200   | 100   |       |
|                                  | 94300   | 250   |       |
| <i>Macrobrachium lanchesteri</i> | 9290    | 18.72 | [113] |
| <i>Lampsilis siliquoidea</i>     | 43300   | 90    | [116] |
| <i>Aeolosoma</i> sp.             | 39460   | 52    |       |
| <i>Limnodrilus hoffmeisteri</i>  | 239390  | 237   | [19]  |
|                                  | 239270  | 237   |       |
|                                  | 275700  | 237   |       |
|                                  | 164550  | 237   |       |
| <i>Tubifex tubifex</i> *         | 26800   | 12    | [116] |
|                                  | 42700   | 45    |       |
|                                  | 85900   | 173   |       |
|                                  | 464750  | 305   |       |
| <i>Lymnaea stagnales</i>         | 255530  | 172   |       |
|                                  | 205250  | 184   |       |
| <i>Ctenopharyngodon idellus</i>  | 541070  | 104.9 | [117] |
| <i>Cyprinus carpio</i>           | 577270  | 104.9 |       |
| <i>Asellus aquaticus</i>         | 333000  | 50    | [116] |
| <i>Crangonyx pseudogracilis</i>  | 694000  | 50    |       |
| <i>Danio rerio</i>               | 8280000 | 86.6  | [118] |

Note: <sup>1</sup> ATV is acute toxicity value; All species used of water quality reference normalization were marked with an \*.

**Table S8 Chronic toxicity of freshwater aquatic organisms of manganese in Fen River**

| Species                      | CTV <sup>1</sup> (ug/L) | Hardess (CaCO <sub>3</sub> mg/L) | Reference |
|------------------------------|-------------------------|----------------------------------|-----------|
| <i>Danio rerio</i>           | 4629.1                  | 95                               | [116]     |
| <i>Daphnia magna</i> *       | 5400                    | 100                              |           |
|                              | 9400                    | 250                              |           |
| <i>Oncorhynchus mykiss</i> * | 920                     | 29.2                             |           |
|                              | 2182                    | 151.2                            |           |
|                              | 700                     | 50                               |           |
| <i>Aeolosoma</i> sp.         | 2520                    | 48                               |           |
| <i>Ceriodaphnia dubia</i> *  | 1045.1                  | 60                               |           |
|                              | 1355.6                  | 48                               |           |
|                              | 1364                    | 52                               |           |

|                                        |        |     |  |
|----------------------------------------|--------|-----|--|
|                                        | 2015   | 52  |  |
|                                        | 2241   | 24  |  |
|                                        | 2246   | 44  |  |
|                                        | 2498   | 20  |  |
|                                        | 2601   | 84  |  |
|                                        | 2826   | 720 |  |
|                                        | 2946   | 52  |  |
|                                        | 2962   | 52  |  |
|                                        | 2984   | 48  |  |
|                                        | 3100   | 76  |  |
|                                        | 3120   | 52  |  |
|                                        | 3250   | 52  |  |
|                                        | 3700   | 72  |  |
|                                        | 3858   | 44  |  |
|                                        | 3935   | 48  |  |
|                                        | 3956   | 52  |  |
|                                        | 4172   | 52  |  |
|                                        | 4782   | 400 |  |
|                                        | 4818   | 52  |  |
|                                        | 4846   | 52  |  |
|                                        | 5235   | 116 |  |
|                                        | 5554   | 200 |  |
|                                        | 6458   | 124 |  |
|                                        | 6526   | 48  |  |
|                                        | 7175   | 52  |  |
|                                        | 7484   | 304 |  |
|                                        | 7848   | 230 |  |
|                                        | 7962   | 384 |  |
|                                        | 8406   | 212 |  |
|                                        | 8439   | 284 |  |
|                                        | 8961   | 390 |  |
|                                        | 11235  | 410 |  |
|                                        | 14718  | 290 |  |
| <i>Chironomus tentans</i>              | 16340  | 89  |  |
| <i>Hyaella azteca</i>                  | 382.8  | 104 |  |
| <i>Lymnaea stagnalis</i>               | 7700   | 174 |  |
| <i>Lemna minor</i>                     | 23370  | 7.2 |  |
| <i>Pseudokirchneriella subcapitata</i> | 123.00 | 8.3 |  |
|                                        | 173.00 | 8.1 |  |
|                                        | 194.40 | 7.9 |  |
|                                        | 273.00 | 7.8 |  |



|                                |          |      |  |
|--------------------------------|----------|------|--|
|                                | 327.00   | 8.4  |  |
|                                | 333.00   | 7.85 |  |
|                                | 362.00   | 7.75 |  |
|                                | 448.50   | 8.15 |  |
|                                | 597.00   | 7.9  |  |
|                                | 621.00   | 7.95 |  |
|                                | 622.70   | 7.8  |  |
|                                | 623.00   | 7.8  |  |
|                                | 634.60   | 7.65 |  |
|                                | 2048.00  | 7.55 |  |
|                                | 2455.00  | 6.95 |  |
|                                | 4567.00  | 6.9  |  |
|                                | 20063.00 | 6.05 |  |
|                                | 36690.00 | 5.8  |  |
| <i>Scenedesmus quadricauda</i> | 1910     | 7.5  |  |

Note: <sup>1</sup> CTV is chronic toxicity value; All species used of water quality reference normalization were marked with an \*.

**Table S9 Water quality parameters in Fen River**

| Sample          | Temp °C | pH   | Hardness(mg/L CaCO <sub>3</sub> ) | DOC(mg C/L) | Ca <sup>2+</sup> (mg/L) | Mg <sup>2+</sup> (mg/L) | Na <sup>+</sup> (mg/L) | K <sup>+</sup> (mg/L) | SO <sub>4</sub> <sup>2-</sup> (mg/L) | Cl <sup>-</sup> (mg/L) | Alkalinity(mg/L) |
|-----------------|---------|------|-----------------------------------|-------------|-------------------------|-------------------------|------------------------|-----------------------|--------------------------------------|------------------------|------------------|
| S1              | 23.8    | 8.48 | 320.29                            | 10.11       | 81.94                   | 24.93                   | 75.94                  | 7.39                  | 342.17                               | 105.10                 | 327.60           |
| S2              | 24.0    | 8.37 | 240.22                            | 10.55       | 79.78                   | 25.23                   | 69.36                  | 6.92                  | 312.18                               | 96.27                  | 262.08           |
| S3              | 23.3    | 8.28 | 220.20                            | 10.87       | 67.95                   | 24.29                   | 86.29                  | 8.36                  | 274.04                               | 110.92                 | 393.12           |
| S4              | 24.3    | 8.37 | 225.20                            | 11.16       | 75.82                   | 25.12                   | 70.83                  | 8.44                  | 287.05                               | 102.63                 | 277.20           |
| S5              | 23.9    | 8.07 | 270.24                            | 9.08        | 68.21                   | 25.18                   | 62.63                  | 7.97                  | 260.97                               | 85.94                  | 352.80           |
| S6              | 21.2    | 8.15 | 170.15                            | 7.85        | 54.42                   | 24.63                   | 46.84                  | 6.06                  | 153.33                               | 25.86                  | 352.80           |
| S7              | 24.1    | 8.15 | 159.14                            | 10.61       | 59.77                   | 25.16                   | 66.89                  | 7.54                  | 228.52                               | 82.73                  | 252.00           |
| S8              | 19.2    | 8.11 | 185.17                            | 8.82        | 56.94                   | 24.43                   | 66.94                  | 6.34                  | 324.00                               | 156.91                 | 246.96           |
| S9              | 22.0    | 8.13 | 179.16                            | 8.12        | 54.27                   | 24.26                   | 51.55                  | 5.29                  | 169.80                               | 64.34                  | 252.00           |
| S10             | 21.2    | 8.16 | 440.40                            | 8.53        | 166.31                  | 19.83                   | 111.29                 | 33.84                 | 605.04                               | 361.39                 | 201.60           |
| S11             | 20.9    | 8.35 | 120.11                            | 12.17       | 33.44                   | 25.09                   | 126.21                 | 17.03                 | 201.73                               | 177.37                 | 252.00           |
| S12             | 20.9    | 8.33 | 141.13                            | 7.67        | 50.57                   | 24.75                   | 73.59                  | 5.29                  | 230.30                               | 93.47                  | 378.00           |
| S13             | 20.7    | 8.34 | 180.16                            | 8.16        | 34.16                   | 24.08                   | 57.06                  | 11.32                 | 121.58                               | 74.62                  | 267.12           |
| S14             | 21.2    | 9.05 | 160.14                            | 6.35        | 40.64                   | 24.43                   | 53.49                  | 2.21                  | 180.22                               | 62.52                  | 252.00           |
| S15             | 21.2    | 8.31 | 200.18                            | 8.20        | 66.36                   | 24.66                   | 49.13                  | 5.48                  | 93.00                                | 46.29                  | 443.52           |
| Median<br>value | 21.2    | 8.31 | 182.66                            | 8.82        | 59.77                   | 24.66                   | 40.34                  | 7.39                  | 230.30                               | 93.47                  | 267.12           |

**Table S10 Acute hazard quotient of metals to aquatic organisms at different sampling points**

| Sample | HQ <sub>Acute</sub> |        |        |        |        |        |        |
|--------|---------------------|--------|--------|--------|--------|--------|--------|
|        | Cd                  | Pb     | Cu     | Zn     | Cr(VI) | Ni     | Mn     |
| S1     | 0.0159              | 0.0155 | 0.0137 | 0.0907 | 0.1988 | 0.0884 | 0.0018 |
| S2     | 0.0076              | 0.0108 | 0.0078 | 0.0148 | 0.1538 | 0.0830 | 0.0020 |
| S3     | 0.0134              | 0.0347 | 0.0083 | 0.0103 | 0.2264 | 0.0726 | 0.0017 |
| S4     | 0.0034              | 0.0217 | 0.0083 | 0.0380 | 0.4305 | 0.0718 | 0.0029 |
| S5     | 0.0164              | 0.0245 | 0.0095 | 0.0176 | 2.8249 | 0.0992 | 0.0186 |
| S6     | 0.0165              | 0.0184 | 0.0050 | 0.0769 | 0.1552 | 0.0596 | 0.0016 |
| S7     | 0.0029              | 0.0030 | 0.0058 | 0.0172 | 1.7929 | 0.0825 | 0.0109 |
| S8     | 0.0500              | 1.5340 | 0.0098 | 0.0442 | 2.0534 | 0.1189 | 0.0082 |
| S9     | 0.0032              | 0.0132 | 0.0062 | 0.0053 | 0.1997 | 0.0550 | 0.0018 |
| S10    | 0.0003              | 0.0013 | 0.0061 | 0.0070 | 0.1464 | 0.1225 | 0.0236 |
| S11    | 0.0054              | 0.0212 | 0.0092 | 0.0217 | 0.2035 | 0.0520 | 0.0036 |
| S12    | 0.0024              | 0.0212 | 0.0138 | 0.0314 | 1.4401 | 0.0633 | 0.0182 |
| S13    | 0.0054              | 0.0077 | 0.0068 | 0.0243 | 0.2167 | 0.0621 | 0.0040 |
| S14    | 0.0033              | 0.0074 | 0.0032 | 0.0012 | 0.1801 | 0.0437 | 0.0013 |
| S15    | 0.0159              | 0.0155 | 0.0137 | 0.0907 | 0.1988 | 0.0884 | 0.0018 |

**Table S11 Chronic hazard quotient of metals to aquatic organisms at different sampling points**

| Sample | HQ <sub>Chronic</sub> |         |        |        |        |        |        |
|--------|-----------------------|---------|--------|--------|--------|--------|--------|
|        | Cd                    | Pb      | Cu     | Zn     | Cr(VI) | Ni     | Mn     |
| S1     | 0.0732                | 0.3970  | 0.0456 | 0.2964 | 0.2902 | 0.4715 | 0.0216 |
| S2     | 0.0350                | 0.2762  | 0.0257 | 0.0482 | 0.2245 | 0.4427 | 0.0242 |
| S3     | 0.0614                | 0.8915  | 0.0274 | 0.0336 | 0.3306 | 0.3869 | 0.0209 |
| S4     | 0.0158                | 0.5581  | 0.0276 | 0.1241 | 0.6287 | 0.3828 | 0.0352 |
| S5     | 0.0756                | 0.6291  | 0.0314 | 0.0575 | 4.1251 | 0.5291 | 0.2267 |
| S6     | 0.0761                | 0.4719  | 0.0165 | 0.2514 | 0.2266 | 0.3177 | 0.0197 |
| S7     | 0.0132                | 0.0782  | 0.0191 | 0.0562 | 2.6181 | 0.4401 | 0.1331 |
| S8     | 0.2297                | 39.3702 | 0.0325 | 0.1445 | 2.9985 | 0.6342 | 0.0993 |
| S9     | 0.0145                | 0.3394  | 0.0206 | 0.0175 | 0.2916 | 0.2934 | 0.0222 |
| S10    | 0.0015                | 0.0325  | 0.0203 | 0.0228 | 0.2138 | 0.6532 | 0.2865 |
| S11    | 0.0249                | 0.5435  | 0.0306 | 0.0710 | 0.2972 | 0.2772 | 0.0433 |
| S12    | 0.0110                | 0.5448  | 0.0457 | 0.1027 | 2.1029 | 0.3373 | 0.2219 |
| S13    | 0.0248                | 0.1973  | 0.0225 | 0.0793 | 0.3164 | 0.3312 | 0.0486 |
| S14    | 0.0149                | 0.1899  | 0.0107 | 0.0040 | 0.2629 | 0.2327 | 0.0156 |
| S15    | 0.0077                | 0.2865  | 0.0222 | 0.1004 | 0.3120 | 0.3080 | 0.0175 |

**Table S12 Pollution index of heavy metals in Fen River**

| Sample | Single factor pollution index |         |        |        |        |        |        | Integrated pollution index (I) |
|--------|-------------------------------|---------|--------|--------|--------|--------|--------|--------------------------------|
|        | Cd                            | Pb      | Cu     | Zn     | Cr     | Ni     | Mn     |                                |
| S1     | 0.1596                        | 0.2558  | 0.1369 | 0.1155 | 0.1217 | 0.4440 | 0.0363 | 0.1814                         |
| S2     | 0.0762                        | 0.1780  | 0.0772 | 0.0188 | 0.0941 | 0.4170 | 0.0407 | 0.1289                         |
| S3     | 0.1340                        | 0.5745  | 0.0823 | 0.0131 | 0.1386 | 0.3644 | 0.0351 | 0.1917                         |
| S4     | 0.0344                        | 0.3596  | 0.0829 | 0.0484 | 0.2635 | 0.3605 | 0.0592 | 0.1726                         |
| S5     | 0.1647                        | 0.4054  | 0.0942 | 0.0224 | 1.7290 | 0.4983 | 0.3813 | 0.4708                         |
| S6     | 0.1658                        | 0.3041  | 0.0495 | 0.0979 | 0.0950 | 0.2992 | 0.0331 | 0.1492                         |
| S7     | 0.0287                        | 0.0504  | 0.0573 | 0.0219 | 1.0974 | 0.4145 | 0.2239 | 0.2706                         |
| S8     | 0.5007                        | 25.3694 | 0.0976 | 0.0563 | 1.2568 | 0.5973 | 0.1670 | 4.0064                         |
| S9     | 0.0317                        | 0.2187  | 0.0619 | 0.0068 | 0.1222 | 0.2763 | 0.0374 | 0.1079                         |
| S10    | 0.0032                        | 0.0209  | 0.0609 | 0.0089 | 0.0896 | 0.6152 | 0.4820 | 0.1830                         |
| S11    | 0.0544                        | 0.3502  | 0.0919 | 0.0277 | 0.1246 | 0.2611 | 0.0728 | 0.1404                         |
| S12    | 0.0239                        | 0.3511  | 0.1371 | 0.0400 | 0.8814 | 0.3176 | 0.3731 | 0.3035                         |
| S13    | 0.0541                        | 0.1271  | 0.0676 | 0.0309 | 0.1326 | 0.3119 | 0.0817 | 0.1151                         |
| S14    | 0.0326                        | 0.1224  | 0.0321 | 0.0015 | 0.1102 | 0.2192 | 0.0262 | 0.0778                         |
| S15    | 0.0167                        | 0.1846  | 0.0665 | 0.0391 | 0.1308 | 0.2901 | 0.0295 | 0.1082                         |

**References:**

1. Schubauer-Berigan MK, Dierkes JR, Monson PD, et al. pH-dependent toxicity of cadmium, copper, nickel, lead and zinc to *Ceriodaphnia dubia*, *Pimephales promelas*, *Hyaella azteca* and *Lumbriculus variegatus*. *Environmental Toxicology and Chemistry*, **1993**, 12(7): 1261-1266.
2. Carlson SE, Rhodes PG, Ferguson MG. Docosahexaenoic acid status of preterm infants at birth and following feeding with human milk or formula. *American Journal of Clinical Nutrition*, **1986**, 44(6): 798-804.
3. Belanger SE, Farris JL, Cherry DS. Effects of diet, water hardness, and population source on acute and chronic copper toxicity to *Ceriodaphnia dubia*. *Archives of Environmental Contamination and Toxicology*, **1989**, 18(4): 601-611.
4. Oris JT, Winner RW, Moore MV. A four-day survival and reproduction toxicity test for *Ceriodaphnia dubia*. *Environmental Toxicology and Chemistry*, **1991**, 10(2): 217-224.
5. Diamond JM, Koplisch DE, Iii MM, et al. Evaluation of the water-effect ratio procedure for metals in a riverine system. *Environmental Toxicology & Chemistry*, **1997**, 16(3): 509-520.
6. Wang N, Mebane CA, Kunz JL, et al. Influence of dissolved organic carbon on toxicity of copper to a unionid mussel (*Villosa iris*) and a cladoceran (*Ceriodaphnia dubia*) in acute and chronic water exposures. *Environmental Toxicology and Chemistry*, **2011**,30(9): 2115-2125.
7. Nebeker AV, Cairns MA, Onjukka ST, et al. Effect of age on sensitivity of *Daphnia magna* to cadmium, copper and cyanazine. *Environmental Toxicology and Chemistry*, **1986**, 5(6):527-530.
8. Baird DJ, Barber I, Bradley M, et al. A comparative study of genotype sensitivity to acute toxic stress using clones of *Daphnia magna* straus. *Ecotoxicology and Environmental Safety*, **1991**, 21(3): 257-265.
9. Meador JP. The interaction of pH, dissolved organic carbon, and total copper in the determination of ionic copper and toxicity. *Aquatic Toxicology*, **1991**, 19(1): 13-31.

10. US EPA. Aquatic Life Ambient Freshwater Quality Criteria-Copper, EPA-822-R-07-001; United States Environmental Protection Agency Office of Water 4304T: Washington DC. 2007.
11. Zhou T, Cao Y, Qin L, et al. Application of biotic ligand model for the acute toxicity of copper to *Daphnia magna* in water of Liao River and Taihu Lake. *Environmental Science*, **2014**, 35(5):332-337.
12. Wang W, Chen S, Wu M, et al. Predicting copper to *Hypophthalmichthys molitrix* and *Ctenopharyngodon idellus* based on Biotic Ligand Model. *Environmental Sciences*, **2014**, 35(10): 3947-3951(in Chinese).
13. Chen S. Water quality criteria and ecological risk assessment of copper in Lancang River. M.S. Thesis, Kunming University of Science and Technology: Kunming. 2014.
14. Zhang YH, Zang WC, Qin LM, et al. Water quality criteria for copper based on the BLM approach in the freshwater in China. *PLOS One*, **2017**, 10.1371/journal.pone.0170105.
15. Khangarot BS, Ray PK. Correlation between heavy metal acute toxicity values in *Daphnia magna* and fish. *Bulletin of Environmental Contamination & Toxicology*, **1987a**, (38): 722-726.
16. Yim JH, Kim KW, Kim SD. Effect of hardness on acute toxicity of metal mixtures using *Daphnia magna*: prediction of acid mine drainage toxicity. *Journal of Hazardous Materials*, **2006**, 138 (1): 16-21.
17. Biesinger KE, Christensen GM. Effects of various metals on survival, growth, reproduction, and metabolism of *Daphnia magna*. *Journal of the Fisheries Research Board of Canada*, **1972**, 29(12): 1691-1700.
18. Chapman A G, Ota S, and Recht F. Effects of water hardness on the toxicity of metals to *Daphnia magna*. US EPA, Corvallis, OR:17 p. 1980.
19. Rathore RS, Khangarot BS. Effects of temperature on the sensitivity of sludge worm *Tubifex tubifex* müller to selected heavy metals. *Ecotoxicology Environmental Safety*, **2002**, 53(1): 27-36.
20. Qureshi SA, Saksena AB, & Singh VP. Acute toxicity of four heavy metals to benthic fish food organisms from the River Khan, Ujjain. *International Journal of Environmental Studies*, **1980**, 15(1): 59-61.
21. Spehar RL, Fiandt JT. Acute and chronic effects of water quality criteria-based metal mixtures on three aquatic species. *Environmental Toxicology and Chemistry*, **1986**, 5(10): 917-931.
22. Cooper NL, Bidwell JR, & Kumar A. Toxicity of copper, lead, and zinc mixtures to *Ceriodaphnia dubia* and *Daphnia carinata*. *Ecotoxicology & Environmental Safety*, **2009**, 72 (5): 1523-1528.
23. Hockett JR, Mount DR. Use of metal chelating agents to differentiate among sources of acute aquatic toxicity. *Environmental Toxicology and Chemistry*, **1996**, 15(10): 1687-1693.
24. Datta S, & Das RC. Influence of some abiotic environmental factors on acute toxicity of inorganic lead to *Cyprinus carpio* var *communis* (Linn.) and *Catla catla* (Ham.) in simulated toxic aquatic environment. *Toxicological & Environmental Chemistry*, **2003**, 85(4-6): 203-219.
25. Kapur K, Yadav NA. The effects of certain heavy metal salts on the development of eggs in common carp, *Cyprinus carpio* var. *communis*. *Clean-Soil, Air, Water*, **2010**, 10(5): 517-522.
26. Khangarot BS, Ray PK. Sensitivity of midge larvae of *Chironomus tentans* Fabricius (*Diptera chironomidae*) to heavy metals. *Bulletin of Environmental Contamination and Toxicology*, **1989**, 42 (3): 325-330.
27. Bailey HC, Liu DHW. *Lumbriculus variegatus*, a Benthic Oligochaete, as a Bioassay Organism. In: J.C. Eaton, P.R.Parrish, and A.C. Hendricks (Eds.), *Aquatic Toxicology and Hazard Assessment*, 3rd Symposium, ASTM STP 707, Philadelphia, 1980. PA: 205-215.
28. Wen RS, Zheng QM, Fang ZQ, et al. Acute toxicity of mercury and lead to grass carps and safety assessment. *Journal of Anhui Agricultural Sciences*, **2007**, 35 (16): 4863-4864, 4914. (in Chinese).
29. Pan TY, Fang SL, Yan YL, et al. Acute toxic effect of water-borne lead on six fishes from the upper reaches of the Yangtze River. *Freshwater Fisheries*, **2016**, (3): 34-39. (in Chinese).

30. Wang YQ, Zhang YQ, Zhao DQ. Effects of heavy metals cadmium, lead and zinc on the survival of *Carassius auratus* and *Misgurnus anguillicaudatus*. *Journal of Gansu Sciences*, **2003**, 15 (1): 35-38. (in Chinese).
31. Liao J. Distribution characterization of heavy metal pollution in Taihu Lake and the derivation of water quality criteria of lead in China. M.S. Thesis, Nanjing University: Nanjing, 2014. (in Chinese).
32. Chen WG, Guo ZJ, Deng PP, et al. Acute toxicity of three heavy metal ions to rose bitterling *Rhodeus ocellatus* Fry. *Fisheries Science*, **2010**, 29 (02): 109-111. (in Chinese).
33. Anderson RL, Walbridge CT, Fiandt JT. Survival and growth of *Tanytarsus dissimilis* (Chironomidae) exposed to copper, cadmium, zinc, and lead. *Archives of Environmental Contamination & Toxicology*, **1980**, 9(3): 329.
34. Rachlin JW, Jensen TE, and Warkentine B. "growth response of the green alga (*Chlorella saccharophila*) to selected concentrations of the heavy metals Cd, Cu, Pb, and Zn." Trace substances in environmental health: proceedings of University of Missouri's... annual conference. 1982.
35. Liu Q. Study on water quality criteria for protecting aquatic organisms of lead and chromium in Taihu Lake. M.S. Thesis, Anhui Jianzhu University: Anhui. 2021.(in Chinese).
36. Rehwoldt R, Menapace LW, Nerrie B, et al. The effect of increased temperature upon the acute toxicity of some heavy metal ions. *Bulletin of Environmental Contamination and Toxicology*, **1972**, 8(2): 91-96.
37. Khangarot BS, Sehgal A, Bhasin MK. "Man and the Biosphere"-Studies on Sikkim Himalayas. Part 1: Acute toxicity of copper and zinc to common carp *Cyprinus carpio* (Linn.) in soft water. *Acta Hydrochimica et Hydrobiologica*, **1983**, 11(6): 667-673.
38. Tabata Y, Ishigure K, Higaki H, et al. Radiation induced copolymerization of fluorine containing monomers. *Journal of Macromolecular Science Chemistry*, **1969**, 4(4): 801-813.
39. Yan ZF, Li XF, Liu DQ, et al. Acute toxicity of zinc to native freshwater organisms under different water hardness. *Environmental Engineering*, **2019**, 257(11): 22-27. (in Chinese).
40. Li L, He YJ, Song KJ, et al. Derivation of water quality criteria of zinc to protect aquatic life in Taihu Lake and the associated risk assessment. *Journal of Environmental Management*, **2021**, 296:113175.
41. Christopher AM, Frank SD, Daniel PH. Acute toxicity of cadmium, lead, zinc, and their mixtures to stream-resident fish and invertebrates. *Environmental Toxicology and Chemistry*, **2012**, 31(6): 1334-1348.
42. Carlson AR, Nelson H, Hammermeister D. Development and validation of site-specific water quality criteria for copper. *Environmental Toxicology and Chemistry*, **1986**, 5(11): 997-1012.
43. Drost RJ, Singer AC. Constrained complexity generalized context-tree algorithms. IEEE/SP 14th Workshop on Statistical Signal Processing, 2007, 131-135.
44. Muyssen BT, Janssen CR. Multigeneration zinc acclimation and tolerance in *Daphnia magna*: implications for water-quality guidelines and ecological risk assessment. *Environmental Toxicology and Chemistry*, **2001**, 20(9): 2053-2060.
45. Muyssen BT, Janssen CR. Tolerance and acclimation to zinc of *Ceriodaphnia dubia*. *Environmental Pollution*, **2002**, 117(2): 301-306.
46. Wang X, Jin FF, Wang YA. Tropical ocean recharge mechanism for climate variability. Part II: A unified theory for decadal and ENSO modes. *Journal of Climate*, **2013**, 16(22): 3599-3616.
47. Ding TT, Du S, Zhang YH, et al. Hardness-dependent water quality criteria for cadmium and an ecological risk assessment of the Shaying river basin, China. *Ecotoxicology and Environmental Safety*, **2020**, 198:110666.

48. Bertramhart PE, Hart BA. Longevity and reproduction of *Daphnia pulex* exposed to cadmium contaminated food or water. *Environmental Pollution*, **1979**, 19(4): 295-305.
49. Elnabarawy MT, Welter AN, Robideau RR. Relative sensitivity of three Daphnid species to selected organic and inorganic chemicals. *Environmental Toxicology and Chemistry*, **2010**, 5(4): 393-398.
50. Hall WS, Paulson RL, Hall LW, et al. Acutetoxicity of cadmium and sodium pentachlorophenate to Daphnids and fish. *Bulletin of Environmental Contamination and Toxicology*, **1986**, 37(2): 308-316.
51. Suresh A, Sivaramakrishna B, Radhakrishnaiah K. Effect of lethal and sublethal concentrations of cadmium on energetics in the gills of fry and fingerlings of *Cyprinus carpio*. *Bulletin of Environmental Contamination & Toxicology*, **1993**, 51(6): 920-926.
52. Ghosal TK, Kaviraj A. Combined effects of cadmium and composted manure to aquatic organisms. *Chemosphere*, **2002**, 46(7): 1099-1105.
53. Shaw JR, Dempsey TD, Chen CY, et al. Comparative toxicity of cadmium, zinc, and mixtures of cadmium and zinc to Daphnids. *Environmental Toxicology and Chemistry*, **2006**, 25(1): 182-189.
54. Mohammed A, Agard JBR. Comparative sensitivity of three tropical Cladoceran species (*Diaphanosoma brachyurum*, *Ceriodaphnia rigaudii* and *Moinodaphnia macleayi*) to six chemicals. *Journal of Environmental Science and Health Part A*, **2006**, 41(12): 2713-2720.
55. Hatakeyama S, Yasuno HM. Effects of cadmium on the periodicity of parturition and brood size of *Moina macrocopa* (cladocera). *Environmental Pollution Series A, Ecological and Biological*, **1981**, 26(2): 111-120.
56. US EPA. Aquatic life ambient water quality criteria for Cadmium-2016. EPA-820-R-16-002. Office of Science and Technology, Health and Ecological Criteria Division. Washington, DC. 2016.
57. Taraldsen JE and Norberg-King TJ. New method for determining effluent toxicity using duckweed (*Lemna minor*). *Environmental Toxicology and Chemistry*, **1990**, 9: 761-767.
58. McCahon CP, Brown AF, Pascoe D. The effect of the acanthocephalan *Pomphorhynchus laevis* on the acute toxicity of cadmium to its intermediate host, the Amphipod *Gammarus pulex*. *Archives of Environmental Contamination and Toxicology*, **1988**, 17(2): 239-243.
59. He YJ. Study on water quality standard of heavy metal zinc and cadmium in Taihu Lake. M.S. Thesis, Anhui Jianzhu University: Anhui. 2021.(in Chinese).
60. Mount DI. Aquatic surrogates. In surrogates Peeies workshop report, Washington, DC: US EPA, 1982.
61. Call DJ, Brooke LT, Ahmad N, et al. Aquatic pollutant hazard assessments and development of a hazard prediction technology by quantitative structure-activity relationships. Second Quarterly Rep., U.S.EPA Cooperative Agreement No.CR 809234-01-0, Ct. For Lake Superior Environ. Stud, Univ. of Wisconsin, Superior, 1981, WI:74.
62. White B. Report of two toxicity evaluations conducted using hexavalent Chromium. Michigan DeP. Nat. Resour., Environ. Protection Bureau Point Sources Studies Section: 4.1979.
63. Mohammed A. Comparative sensitivities of the tropical Cladocera, *Ceriodaphnia rigaudii* and the temperate species *Daphnia magna* to seven toxicants. *Toxicology Environmental and Chemistry*, **2007**, 89(2): 347-352.
64. Shell Oil Co. Toxicity Tests with *Daphnia magna*: acute toxicity of five test materials to a newly-introduced strain of *D. magna* (Received October, 1984) with cover letter dated 103086. EPA/OTS Doc#86870000021 :16 p.(NTIS/OTS 0513367), 2000.
65. Enserink L, Luttmer W, & Maasdiepeveen H. Reproductive strategy of *Daphnia magna* affects the sensitivity of its progeny in acute toxicity tests. *Aquatic Toxicology*, **1990**, 17(1): 15-26.
66. Guilhermino L, Diamantino T, Silva MC. Acute toxicity test with *Daphnia magna*: an alternative to mammals

in the prescreening of chemical toxicity. *Ecotoxicology and Environmental Safety*, **2000**, 46(3): 357-362.

67. Mount DI, & Norberg UT. A seven-day life cycle Cladoceran toxicity test. *Environmental Toxicology & Chemistry*, **1984**, 3(3): 425-434.
68. Mount DI. Description of the toxicity tests performed on  $\text{Cr}^{6+}$  using Cladocerans. US EPA, Duluth, MN (Memo to C. Stephan, US EPA, Duluth, MN):7 p. 1982.
69. Jop KM, Rodgers JH, Price EE, et al. Renewal device for test solutions in *Daphnia* toxicity tests. *Bulletin of Environmental Contamination & Toxicology*, **1986**, 36(1): 95-100.
70. Bataccatalan Z, & Cairns J. Survival of *Daphnia pulex* under thermal-stress and sublethal concentration of chromate. *Kalikasan, the Philippine journal of biology*, **1977**, 6(1): 47-54.
71. Khangarot BS, Ray PK. Sensitivity of freshwater pulmonate snails, *Lymnaea luteola* L. to heavy metals. *Bulletin of Environmental Contamination and Toxicology*, **1988**, 41(2): 208-213.
72. Reynoldson TB, Rodriguez P, & Madrid MM. A comparison of reproduction, growth and acute toxicity in two populations of *Tubifex tubifex* (Müller, 1774) from the north American Great Lakes and northern Spain. *Hydrobiologia*, **1996**, 334(1-3): 199-206.
73. Khangarot BS. Toxicity of metals to a freshwater Tubificid worm, *Tubifex tubifex* (Muller). *Bulletin of Environmental Contamination & Toxicology*, **1991**, 46(6): 906-912.
74. Ewell WS, Gorsuch JW, Kringle RO, et al. Simultaneous evaluation of the acute effects of chemicals on seven aquatic species. *Environmental Toxicology and Chemistry*, **1986**, 5(9): 831-840.
75. Cowgill UM, Milazzo DP. The response of the three brood Ceriodaphnia test to fifteen formulations and pure compounds in common use. *Archives of Environmental Contamination and Toxicology*, **1991**, 21(1): 35-40.
76. Liang F. Risk assessment of heavy metals in typical watershed of China and derivation of hexavalent chromium water quality benchmark. Master's thesis of Nanjing: Nanjing University, Nanjing. 2011.
77. Zhang YL, Yuan J, Chen LP, et al. Joint toxicity experiment of three heavy metal on fry of *Carassius auratus*. *Hebei YuYe*, **2011**, (2): 24-27. (in Chinese).
78. Yang LH, Fang ZQ, Zheng WB. Safety assessment and acute toxicity of heavy metals to Crucian *Carassius auratus*. *Journal of south China normal university*, **2003**, (2): 101-105. (in Chinese).
79. Pickering QH, & Henderson C. The acute toxicity of some heavy metals to different species of warm water fishes. *Air & Water Pollution*, **1966**, 10(6): 453-463.
80. Adelman IR, Jr LLS, Siesennop GD. Acute toxicity of sodium chloride, pentachlorophenol, guthion, and hexavalent chromium to fathead minnows (*Pimephales promelas*) and goldfish (*Carassius auratus*). *Fisheries, Wildlife, and Conservation Biology*, **1976**, 33(2): 209-214.
81. Lv YP, Li XL, Jia XY. Study on the acute toxicity and joint toxicity of  $\text{Cr}^{6+}$ ,  $\text{Mn}^{7+}$  and  $\text{Hg}^{2+}$  on the *Macrobrachium nipponense*. *Journal of Shanghai Fisheries University*, **2007**, (6): 549-554. (in Chinese).
82. Wong CK. Effects of chromium, copper, nickel, and zinc on survival and feeding of the Cladoceran *Moina macrocopa*. *Bulletin of Environmental Contamination and Toxicology*, **1992**, 49(4): 593-599.
83. Kazlauskienė N, Burba A and Svecevičius G. Acute toxicity of five galvanic heavy metals to Hydrobionts. *Ekonomika Ekologija Cotsium*, **1994**, 1:33-36.
84. Meng FJ. Ecotoxicological effects of combined pollutions of perchlorate and chromium to *Daphnia carinata* and *Scenedesmus obliquus*. M.S. Thesis, South China Agricultural University: Guangdong, 2010. (in Chinese).
85. Chen HL, Pan G, Yan H, et al. Toxic effects of hexavalent chromium on the growth of Blue-Green microalgae. *Environmental Science*, **2003**, 2:13-18. (in Chinese).



86. St-Laurent D, Blaise C, Macquarrie P, et al. Comparative assessment of herbicide phytotoxicity to *Selenastrum capricornutum* using microplate and flask bioassay procedures. *Environmental Toxicology and Water Quality*, **1992**, 7(1): 35-48.
87. Liang F, Yang SG, Sun C. The acute toxicity of hexavalent chromium on *Pelteobagrus fulvidraco* Fry and Fingerling. *Journal of Agro-Environment Science*, **2010**, 29(9): 1665-1669. (in Chinese).
88. Keithly J, Brooker JA, DeForest DK, et al. Acute and chronic toxicity of nickel to a Cladoceran (*Ceriodaphnia dubia*) and an Amphipod (*Hyaella azteca*). *Environmental Toxicology and Chemistry*, **2004**, 23(3): 691-696.
89. Griffith RJ, Luo J, Gao J, et al. Effects of particle composition and species on toxicity of metallic nanomaterials in aquatic organisms. *Environmental Toxicology and Chemistry*, **2008**, 27(9): 1972-1978.
90. Tsui MTK, Wang WX, and Chu LM. Influence of Glyphosate and its formulation (Roundup) on the toxicity and bioavailability of metals to *Ceriodaphnia dubia*. *Environmental Pollution*, **2005**, 138(1): 59-68.
91. Kuhn R, and Pattard M. Results of the harmful effects of water pollutants to green algae (*Scenedesmus subspicatus*) in the cell multiplication inhibition test. *Water Research*, **1990**, 24(1): 31-38.
92. Wang W. Toxicity tests of aquatic pollutants by using common Duck weed. *Environmental Pollution (Series B)*, **1986**, 11(1): 1-14.
93. Wang W. Toxicity of nickel to common Duckweed (*Lemna minor*). *Environmental Toxicology and Chemistry*, **1987**, 6(12): 961-967.
94. Khellaf N, and Zerdaoui M. Growth response of the Duckweed *Lemna minor* to heavy metal pollution. *Iranian Journal of Environmental Health Science & Engineering*, **2009**, 6(3): 161-166.
95. Bringmann G and Kuhn R. Comparative water-toxicological investigations on bacteria, algae, and Daphnia. TR-TS-002, Literature Research Company, Annandale, VA:26 p.1959.
96. Isherwood DM. Photoinduced toxicity of metals and PAHs to *Hyaella azteca*: UV-mediated toxicity and the effects of their photoproducts. M.S. Thesis, University of Waterloo, Canada: 266 p. 2009.
97. Liber K, Doig LE and White-Sobey SL. Toxicity of uranium, molybdenum, nickel, and arsenic to *Hyaella azteca* and *Chironomus dilutus* in water-only and spiked-sediment toxicity tests. *Ecotoxicology and Environmental Safety*, **2011**, 74(5): 1171-1179.
98. Jindal R and Verma A. Heavy metal toxicity to *Daphnia pulex*. *Indian Journal of Environmental Health*, **1990**, 32(3): 289-292.
99. Khangarot BS, Ray PK and Chandra H. *Daphnia magna* as a model to assess heavy metal toxicity: comparative assessment with mouse system. *Acta hydrochimica et hydrobiologica*, **1987b**, 15(4): 427-432.
100. Call DJ, Brooke LT, Ahmad N, et al. Toxicity and metabolism studies with EPA (Environmental Protection Agency) priority pollutants and related chemicals in freshwater organisms. EPA 600/3-83-095, US EPA, Duluth, MN:120 p.1983.
101. Alsop D and Wood CM. Metal uptake and acute toxicity in zebrafish: common mechanisms across multiple metals. *Aquatic Toxicology*, **2011**, 105(3/4): 385-393.
102. Nebeker AV, Savonen C, and Stevens DG. Sensitivity of rainbow trout early life stages to nickel chloride. *Environmental Toxicology and Chemistry*, **1985**, 4(2): 233-239.
103. Buhl KJ, and Hamilton SJ. Relative sensitivity of early life stages of arctic grayling, Coho Salmon, and Rainbow Trout to nine inorganics. *Ecotoxicology and Environmental Safety*, **1991**, 22: 184-197.
104. Palawski D, Hunn JB, and Dwyer FJ. Sensitivity of young striped bass to organic and inorganic contaminants in fresh and saline waters. *Transactions of the American Fisheries Society*, **1985**, 114(5): 748-753.

105. Bentley RE, Heitmuller T, Sleight III BH, et al. Acute toxicity of nickel to Bluegill (*Lepomis macrochirus*), Rainbow Trout (*Salmo gairdneri*), and Pink Shrimp (*Penaeus duorarum*). US EPA, Criteria Branch, WA-6-99-1414-B, Washington, D.C. 1975.
106. Ding SR. Acute toxicities of vanadium, nickel and cobalt to several species of aquatic organisms. *Journal of Environmental Quality*, **1980**, 1: 17-21.
107. Rehwoldt R, Lasko L, Shaw C, et al. The acute toxicity of some heavy metal ions toward benthic organisms. *Bulletin of Environmental Contamination and Toxicology*, **1983**, 10(5): 291-294.
108. Virk S, and Sharma RC. Effect of nickel and chromium on various life stages of *Cyprinus carpio* Linn. *Indian Journal of Ecology*, **1995**, 22(2): 77-81.
109. Rao TS, Rao MS, and Prasad SBSK. Median tolerance limits of some chemicals to the fresh water fish "*Cyprinus carpio*". *Indian Journal of Environmental Health*, **1975**, 17(2): 140-146.
110. Blaylock BG, and Frank ML. A comparison of the toxicity of nickel to the developing eggs and larvae of Carp (*Cyprinus carpio*). *Bulletin of Environmental Contamination and Toxicology*, **1979**, 21(4-5): 604-611.
111. Rehwoldt R, Bida G, and Nerrie B. Acute toxicity of copper, nickel, and zinc ions to some Hudson River fish species. *Bulletin of Environmental Contamination and Toxicology*, **1971**, 6(5): 445-448.
112. Lu CH. Two heavy metal cobalt and nickel's toxicity effects on two different loaches. M.S. Thesis, Henan Normal University: Henan, 2017. (in Chinese).
113. Shuhaimi-Othman M, Nadzifah Y, Nur-Amalina R, et al. Deriving freshwater quality criteria for copper, cadmium, aluminum and manganese for protection of aquatic life in Malaysia. *Chemosphere*, **2013**, 90(11): 2631-2636.
114. Eisentraeger A, Dott W, Klein J, et al. Comparative studies on algal toxicity testing using Fluorometric Microplate and Erlenmeyer Flask growth-inhibition assays. *Ecotoxicology and Environmental Safety*, **2003**, 54(3): 346-354.
115. Yan H, Pan G, Huo RL. Toxic effects of Cu, Zn and Mn on the inhibition of *Chlorella pyrenoidosa*'s growth. *Acta Scientiae Circumstantiae*, **2001**, 21(3): 328-322. (in Chinese).
116. CCME (Canadian Council of Ministers of the Environment), Scientific criteria document for the development of the Canadian water quality guidelines for the protection of aquatic life—Manganese, PN 1601(ISBN 978-1-77202-058-8), 2019.
117. Cheng WD. Effects of exposure of manganese on ecological toxicology of *Ctenopharyngodon idellus* and *Cyprinus Carpio*. M.S. Thesis, University of Southwest, Chongqing, 2017. (in Chinese).
118. Wu S. Study on zebrafish indicating acid wastewater pollution in coal mine. M.S. Thesis, University of Guizhou: Guizhou, 2009. (in Chinese).
